# Supplementary material for: The Vaccinia Virus DNA Helicase Structure from Combined Single-Particle Cryo-Electron Microscopy and AlphaFold2 Prediction
Source: MDPI journal article supplement (doi:10.3390/v14102206), 2022-10-07
Supplement: s1 [file s1]

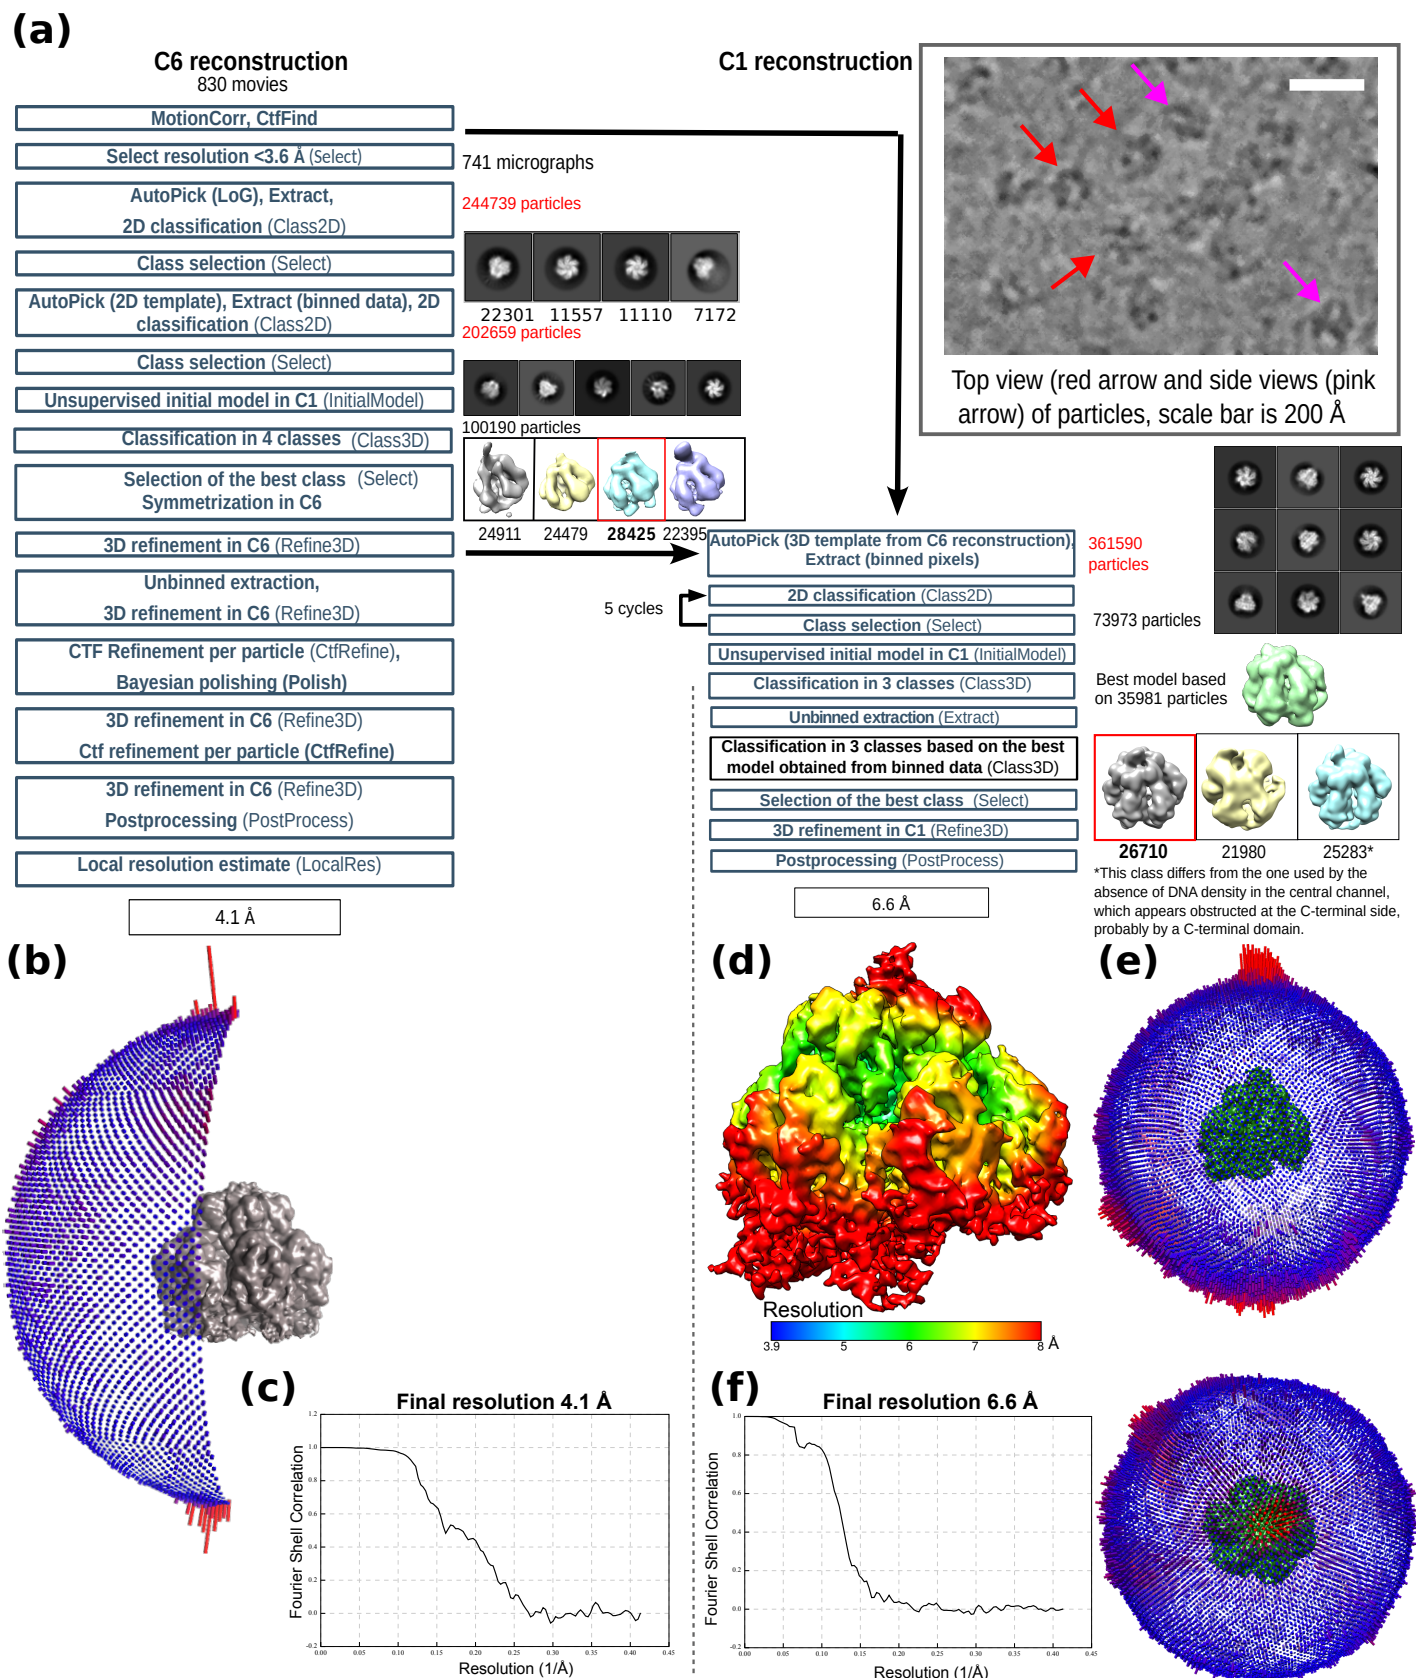

**Figure S1.** Cryo-EM data processing with Relion 3.1. **(a)** Schematic flow chart of cryo-EM data processing with for particle reconstruction using C6 symmetry (left) and without symmetry (right). Top views of D5<sub>323-785</sub> particles (red arrows) and side views (pink arrows) in a micrograph (2  $\mu$ m defocus) are shown on the top right insert. **(b)** Local resolution of the C6 reconstruction. **(c)** Histogram of the orientations of the projections used for 3D reconstruction mapped onto an asymmetric unit in C6 **(d)** Histogram of the orientations of the projections used for 3D reconstruction in C1. **(e)** Fourier shell correlation (FSC) of the reconstruction in C6. **(f)** FSC for the reconstruction in C1.

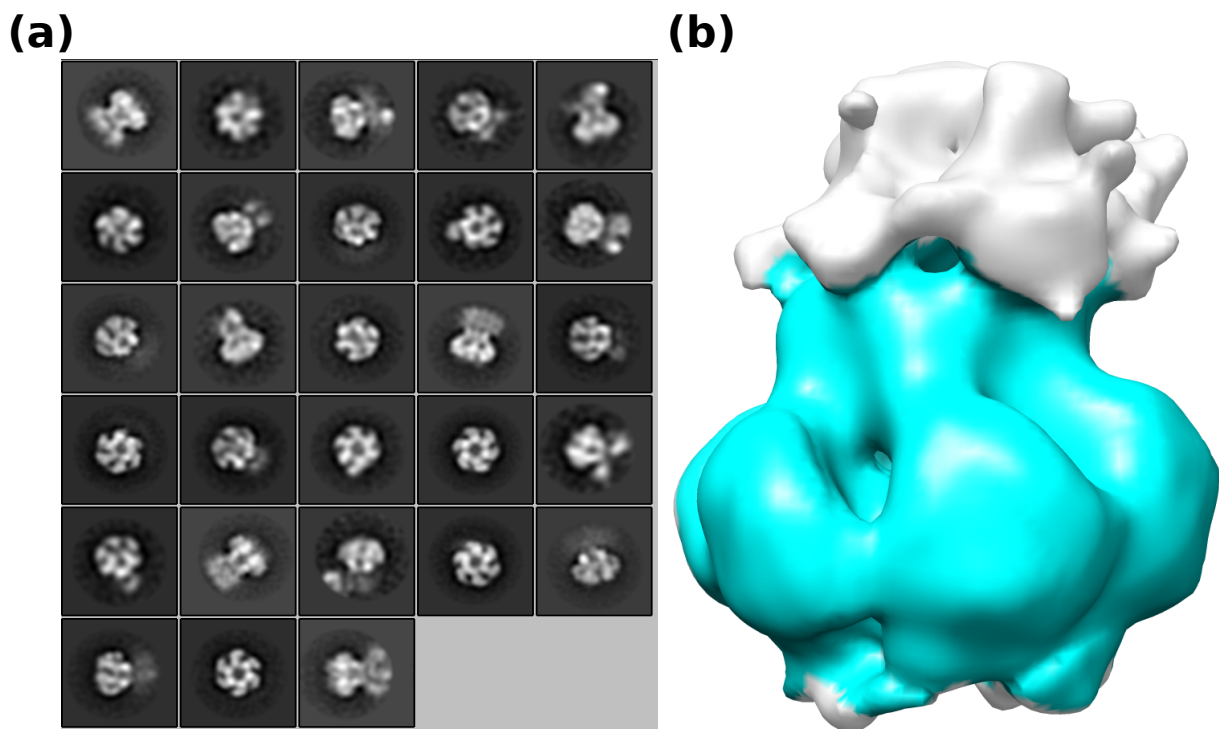

**Figure S2.** EM of D5fl. **(a)** 2D classes containing 23471 particles of full-length D5 in negative stain. **(b)** Reconstruction of D5fl at 17 Å resolution without imposed symmetry. Density corresponding to reconstructions of D5<sub>323-785</sub> in negative stain (see Hutin *et al.*, 2016) is colored in cyan. The white density corresponds to disordered primase and Zn-domains.

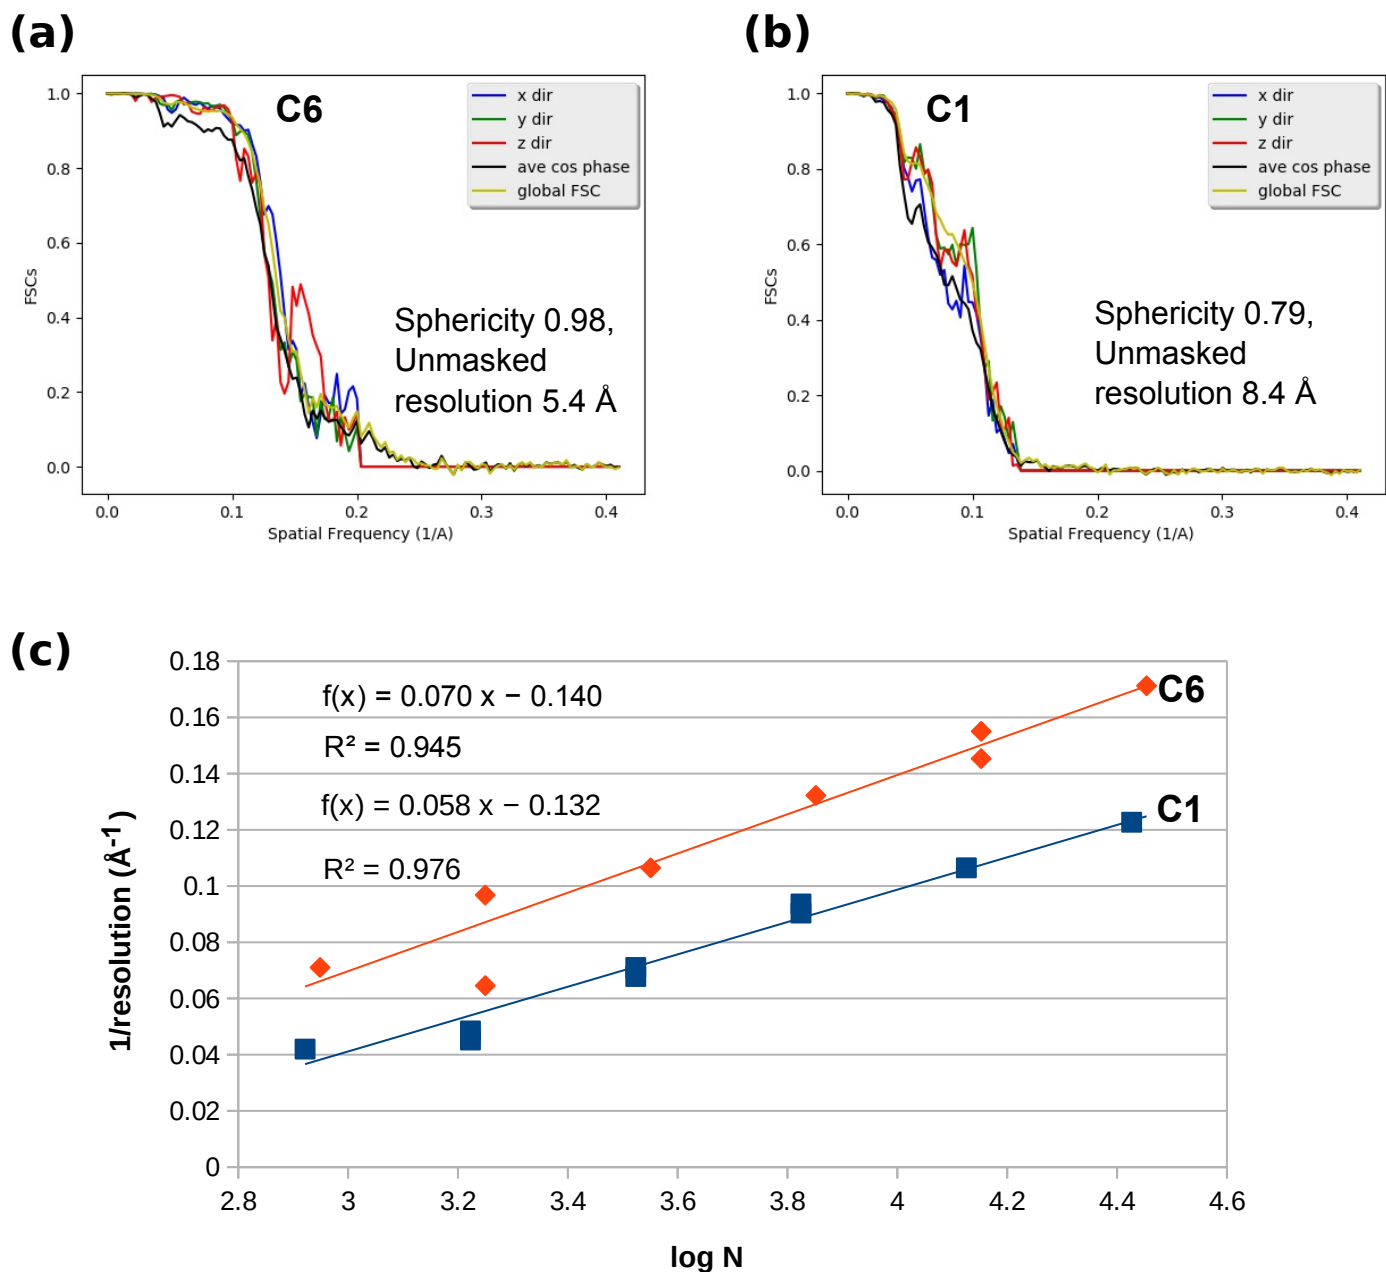

**Figure S3.** Validation of the final reconstructions. **(a)** Analyses with 3DFSC of the 6-fold symmetric reconstruction and **(b)** the reconstruction without symmetry. **(c)** ResLog analysis of the unmasked reconstruction according to the procedure described by Stagg and co-workers. The particles used for the final reconstruction have been split randomly into 2, 4, 8, 16 and 32 sets. For each number N of particles 2 structures has been refined using Refine3D in Relion. The inverse of the obtained unmasked resolution has been plotted against the  $\log_{10}$  of the particle number.
